# Supplementary material
Source: HighWire-hosted journal article supplement (doi:10.1101/rna.080769.125)
Supplement: Supplemental_Figure_Legends.docx [file Supplemental_Figure_Legends.docx]

**Supplemental Fig 1.** (A) Enrichment or depletion of individual amino acids in 33–104aa (blue), 105–188aa (orange) and 189–265aa (green) of SFPQ IDR, as analyzed using Composition Profiler (http://www.cprofiler.org/). The SwissProt 51 dataset was used as the background. p values were determined by using a two-sample t-test, with Bonferroni correction for multiple comparisons. If the statistical test showed no significant difference (*p* > 0.05), it is not specified in the figure. (B) Immunoblotting of Flag-tagged MCP-SFPQ WT and mutants in the Mini-NEAT1 and Mini-NEAT1/6×MS2@8.2kb cells (Fig. 1B–D). -Tubulin is a loading control. Molecular weight markers (MW) are shown on the right.

**Supplemental Fig 2.** The central and C-terminal regions of SFPQ are relatively well conserved across species. (A) Multiple sequence alignment of full-length SFPQ from *Homo sapiens* (human), *Mus musculus* (mouse), *Bos taurus* (bovine), *Loxodonta africana* (elephant), *Monodelphis domestica* (opossum), *Gallus gallus* (chicken), *Pseudonaja textilis* (snake), *Xenopus laevis* (frog), and *Danio rerio* (zebrafish). (B) Guide tree of SFPQ IDRs from human to zebrafish. (C) Enrichment or depletion of individual amino acids in human SFPQ IDR (blue) and zebrafish SFPQ IDR (orange), as analyzed using Composition Profiler. The IDR region of zebrafish was defined as the corresponding region to the human SFPQ IDR in the alignment shown in Fig. 2A. The SwissProt 51 dataset was used as the background. p values were determined by using a two-sample t-test, with Bonferroni correction for multiple comparisons. If the statistical test showed no significant difference (*p* > 0.05), it is not specified in the figure. (D) Immunoblotting of Flag-tagged MCP-SFPQ WT and mutants in the Mini-NEAT1 and Mini-NEAT1/6×MS2@8.2kb cells (Fig. 2B–D). -Tubulin is a loading control. Molecular weight markers (MW) are shown on the right.

**Supplemental Fig 3.** (A) Compositional and patterning features of each subdomain within the SFPQ IDR, as analysed using the NARDINI+ algorithm. Only features with an absolute Z-score ≧ 1 in at least one subdomain are shown. (B) Immunoblotting of Flag-tagged MCP-SFPQ WT and mutants in the Mini-NEAT1 and Mini-NEAT1/6×MS2@8.2kb cells (Fig. 3A–C). -Tubulin is a loading control. Molecular weight markers (MW) are shown on the right.

**Supplemental Fig 4.** (A) Final structure in the two-molecule system. (B) Intermolecular residue contacts in the two-molecule system. The quantity proportional to the probability of the residue distance being ≤ 7.0 Å is displayed on a color map.

**Supplemental Fig 5.** BRD4 has IDR with a blocky pattern of proline and glutamine. (A) Table of the top 10 proteins based on P/Q-rich values. From left to right: Protein name, P/Q-rich sequence (70 amino acids), P/Q-rich values (The number of P × the number of Q), and Motif counts (“PPQQ” and “QQPP”). (B) Left: Scatter plot showing P/Q-rich values on the X-axis and the count of "PPXQQ" or "QQXPP" motifs on the Y-axis. Protein names are displayed for IDRs with a P/Q-rich value of 500 or higher and a motif count of at least 5. Right: Scatter plot with P/Q-rich values on the X-axis and the count of "PPPQQQ" or "QQQPPP" motifs on the Y-axis. Protein names are shown for IDRs with a P/Q-rich value of 500 or higher and a motif count of at least 2. (C) A diagram showing the positions of “PPQQ” and “QQPP” motifs in each protein. In Fig. 5E and F, the region from 742 to 1039 aa of BRD4 is defined as the P/Q-rich IDR. (D) Immunoblotting of Flag-tagged MCP-SFPQ WT and mutants in the Mini-NEAT1 and Mini-NEAT1/6×MS2@8.2kb cells (Fig. 5E, F). a-Tubulin is a loading control. Molecular weight markers (MW) are shown on the right.
