# Supplementary material
Source: HighWire-hosted journal article supplement (doi:10.1101/rna.080769.125)
Supplement: Supplemental_Table_S1.xlsx [file Supplemental_Table_S1.xlsx]

## Sheet: Sheet1
Table S1
Reagent or Resource	Source	Identifier
Antibodies
anti-DDDDK rabbit polyclonal Ab	MBL	PM020
anti-SRRM2 mouse monoclonal Ab	Sigma	S4045
anti-FLAG mouse monoclonal Ab	Sigma	F3165
anti-a-Tubulin mouse monoclonal Ab	Abcam	ab7291
Goat anti-rabbit Alexa Fluor 405	Invitrogen	A31556
Goat anti-mouse Alexa Fluor 488	Invitrogen	A28175
Mouse IgG HRP Linked Whole Ab	Cytiva	NA931
Bacterial and Virus Strains
DH5α Competent Cells	Thermo Fisher Scientific	18265017
Stbl3 Competent Cells	Thermo Fisher Scientific	C737303
Chemicals, peptides, and recombinant proteins
Z-Leu-Leu-Leu-al (MG132)	Sigma	C2211
Blocking reagent	Roche	11096176001
TransIT LT-1 Reagent	Mirus	MIR2300
cOmplete, EDTA free Protease Inhibitor Cocktail	Roche	5056489001
ProLong Diamond Antifade Mountant	Invitrogen	P36970
Critical Commercial Assays
Stellaris FISH probe (Human NEAT1_5 with Quaser 570 Dye)	LGC Biosearch Technologies	Custom (see Table S2)
Stellaris FISH probe (Human NEAT1_14.5–16.6 kb with Quaser 570 Dye)	LGC Biosearch Technologies	Custom (see Table S2)
n-Fusion® HD Cloning Kit	Takara Bio	639649
Experimental Models: Cell Lines
Human HAP1 cell line	Horizon Discovery	C631, RRID:CVCL_Y019
HAP1 Mini-NEAT1 (∆1–8 kb/16.6–22.6 kb)	Takakuwa et al., 2023	N/A
HAP1 Mini-NEAT1/6×MS2@8.2 kb	Takakuwa et al., 2023	N/A
Recombinant DNA
Plasmid: pcDNA5/FRT/TO/i/FLAG/MCP/SFPQ WT	Takakuwa et al., 2023	N/A
Plasmid: pcDNA5/FRT/TO/i/FLAG/MCP/SFPQ ∆RRM2/NOPS	Takakuwa et al., 2023	N/A
Plasmid: pcDNA5/FRT/TO/i/FLAG/MCP/SFPQ ∆IDR (∆33–265aa)	Takakuwa et al., 2023	N/A
Plasmid: pcDNA5/FRT/TO/i/FLAG/MCP/SFPQ ∆33–104aa	This study	N/A
Plasmid: pcDNA5/FRT/TO/i/FLAG/MCP/SFPQ ∆105–188aa	This study	N/A
Plasmid: pcDNA5/FRT/TO/i/FLAG/MCP/SFPQ ∆189–265aa	This study	N/A
Plasmid: pcDNA5/FRT/TO/i/FLAG/MCP/humanSFPQ zebrafishPLD	This study	N/A
Plasmid: pcDNA5/FRT/TO/i/FLAG/MCP/SFPQ PQPQ (33–104aa)	This study	N/A
Plasmid: pcDNA5/FRT/TO/i/FLAG/MCP/SFPQ PPQQ (33–104aa)	This study	N/A
Plasmid: pcDNA5/FRT/TO/i/FLAG/MCP/SFPQ P3Q3 (33–104aa)	This study	N/A
Plasmid: pcDNA5/FRT/TO/i/FLAG/MCP/SFPQ P12Q12 (33–104aa)	This study	N/A
Plasmid: pcDNA5/FRT/TO/i/FLAG/MCP/SFPQ P36Q36 (33–104aa)	This study	N/A
Plasmid: pcDNA5/FRT/TO/i/FLAG/MCP/SFPQ P3Q3×3 (33–188aa)	This study	N/A
Plasmid: pcDNA5/FRT/TO/i/FLAG/MCP/SFPQ P3Q3×8 (33–188aa)	This study	N/A
Plasmid: pcDNA5/FRT/TO/i/FLAG/MCP/SFPQ P3Q3×12 (33–188aa)	This study	N/A
Plasmid: pcDNA5/FRT/TO/i/FLAG/MCP/SFPQ BRD4 PQ-rich	This study	N/A
Software and Algorithms
R	CRAN	https://cran.r-project.org/
R studio	Posit	https://posit.co/download/rstudio-desktop/
CellProfiler	BROAD INSTITUTE	https://cellprofiler.org/
Python	Python Software Foundation	https://www.python.org/
g:Profiler	BIIT	https://biit.cs.ut.ee/gprofiler/gost
GENESIS	RIKEN	https://www.r-ccs.riken.jp/labs/cbrt/
ImageJ/FIJI	NIH	https://imagej.nih.gov/ij/
NARDINI+	GitHub/Google Colab Notebook	https://github.com/mshinn23/nardini
