# Supplementary material
Source: HighWire-hosted journal article supplement (doi:10.1101/rna.080769.125)
Supplement: Supplemental_Table_S2.xlsx [file Supplemental_Table_S2.xlsx]

## Sheet: Table S1
Table S2
Human NEAT1_5' probe set (5'-3')	Human NEAT1_14.5-16.6 kb probe set (5'-3')
caagttgaagattagccctc	ctcacaaaatccaggaacca
agcccttggtctggaaaaaa	gctggattagccttttcaaa
aagttcagttccacaagacc	gttaggagaaaacatggggt
caggccgagcgaaaattaca	aagtctagatagagtcctcc
ctgtcaaacatgctaggtgc	cctgtcacttgttatgctaa
aagcgttggtcaatgttgtc	ggtgtaaggacaacaggcta
gtggagtgagctcacaagaa	gttaatagctgtattagcca
cttaccagatgaccaggtaa	aaccattaggaactggcacg
ttaccaacaataccgactcc	tcgctattttgaagtgcaga
cggtccatgaagcatttttg	aataatgaggtagggcttcc
tcgccatgaggaacactata	tagccaggagaattctggaa
atctgcaggcatcaattgag	aaggtaaacatgcagcctgg
agcaaggcctggaaacagaa	cggcatgaagacatcacagg
catctgctgtggacttttta	gacgtaccttattcttgcat
ttcatgggctctggaacaag	aatagacgtgagtggatgga
gatgcagcatctgaaaacct	gctttctgtgtaatgcaaag
aaactagtatgaccggaggc	cgaggtagacagaccaagac
ttgaagcaaggttccaagca	ggcagtgaggacaactagat
tgttctacagcttagggatc	aagtactctgtgatggggta
tacaaggcatcaatctgcgt	gtaaccattaggcagagcaa
caaacaggtgggtaggtgag	gcaagctgggtttgtatgaa
cttctccgagaaacgcacaa	ctacgctctctgaatgtgac
ccaagttatttcatcaggct	tggaaaacaacccatcccag
tctaatatatccccagtcta	gaagagctagccacacagtg
cacaacacaatgacaccctt	acattccgggtacacagaac
caaactagacctgccatttc	gctggacactagaacaggac
ctcctagtaatctgcaatgc	agcaggaataggctgttgag
aaagagcactaccggtgtac	aaaaagttccagcaggctgt
tcctcttactagaatgccaa	ccagcatggcaacatatttt
ctaagcaacttctcacttcc	tgaaaaaggctgccaggggg
taacacttcttcagtcttcc	gcacagccaaatcaagtcac
cctttggttctcggaaaact
tgtgagatggcatcacacac
ccaggaggaagctggtaaag
ctctgaaacaggctgtcttg
tcacttgataacacccacac
cagcgaaggatgctgatctg
atcaaccacctaagttgcta
gtggtcccttaaatacgtta
agaagagcccatctaatctc
gatgtgtttctaaggcacga
ggtcttgttttccaaactga
catgtagtaaaggcacctcg
ccattggtattactttacca
ctctaaatcccaacgacagt
atttcacaacagcatacccg
ccagtactttcaaccatcta
agttcttaccatacagagca
